# Supplementary material for: Focused learning by antibody language models using preferential masking of non-templated regions
Source: PubMed Central journal article supplement (PMC11565838; doi:10.1101/2024.10.23.619908), 2024-10-28
Supplement: NIHPP2024.10.23.619908V1-supplement-1.pdf [file NIHPP2024.10.23.619908V1-supplement-1.pdf]

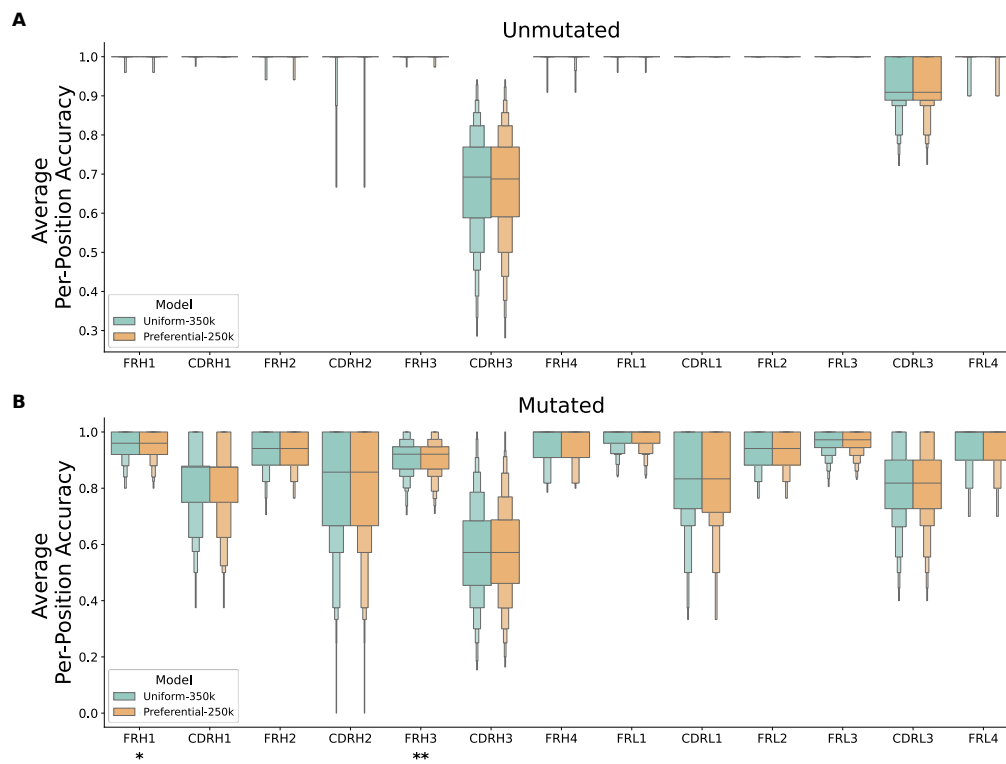

**Figure S1. Per-position residue prediction accuracy.** For 1000 unmutated (**A**) and mutated (**B**) test sequences, each residue was iteratively masked and predicted by both models (Uniform-350k and Preferential-250k). Mean prediction accuracy is plotted for each FR and CDR. Statistical significance for each region was calculated using a two-sided paired t-test with Bonferroni correction for multiple testing (14 regions).

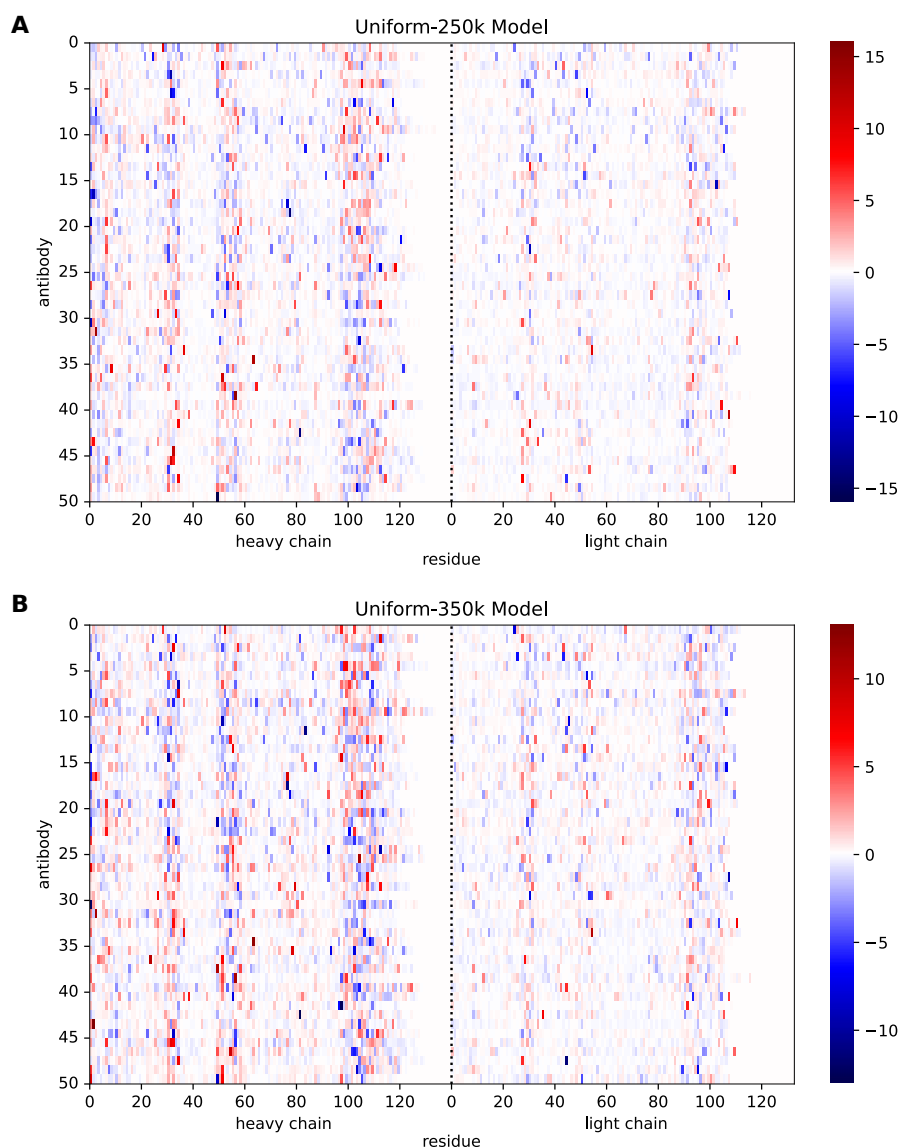

**Figure S2. AttCAT analysis on the Uniform-250k and Uniform-350k CoV specificity classifier models.** Normalized AttCAT impact scores with respect to the correct label class for the same 50 systematically chosen test sequences for the CoV specificity classifiers trained on the Uniform-250k (**A**) and Uniform-350k (**B**) base models. Sequences are sorted in ascending order by average prediction probability across the classifiers trained on all 3 base models.
